# Supplementary material for: Predictive Value of Geriatric Nutritional Risk Index in Patients With Coronary Artery Disease: A Meta-Analysis
Source: Front Nutr. 2021 Sep 29;8:736884. doi: 10.3389/fnut.2021.736884 (PMC8511313; doi:10.3389/fnut.2021.736884)
Supplement: Supplementary file 2 [file Table_1.pdf]

Supplemental Table S1 Methodological quality assessment based on the Newcastle-Ottawa Scale

[illegible]
